# Supplementary material for: Facile synthesis of Z-scheme Fe-nPPy/BiOI nanocomposites for enhanced visible light driven photocatalytic activity
Source: Royal Society of Chemistry journal article supplement (doi:10.1039/d3va00250k), 2023-11-14
Supplement: d3va00250k1.pdf [file d3va00250k1.pdf]

## Facile Synthesis of Z-Scheme Fe-nPPy/BiOI Nanocomposite for Enhanced Visible Light Driven Photocatalytic Activity

Rajesh Kumar<sup>a,b</sup>, Rituporn Gogoi<sup>a</sup>, Kajal Sharma<sup>a</sup>, Astha Singh<sup>a</sup>, Prem Felix Siril<sup>a\*</sup>

<sup>a</sup> School of Chemical Sciences, Indian Institute of Technology Mandi, Mandi, Himachal Pradesh-175005, India

<sup>b</sup> Govt. College Kullu, Himachal Pradesh- 175101, India

\*Corresponding author: [prem@iitmandi.ac.in](mailto:prem@iitmandi.ac.in)

### Table of Content:

| Sr. No. | Contents                                                                                                                                                                                                                 | Page |
|---------|--------------------------------------------------------------------------------------------------------------------------------------------------------------------------------------------------------------------------|------|
| 1       | <b>Fig. S1:</b> XRD patterns (a) and FTIR spectra (b) of the synthesized nanocomposites                                                                                                                                  | S-2  |
| 2       | <b>Fig. S2:</b> XPS survey spectra of synthesized nanocomposites.                                                                                                                                                        | S-2  |
| 3       | <b>Fig. S3:</b> Deconvoluted Fe2p XPS spectra of (a) Fe-nPPy and (b) Fe-nPPy/BiOI-3                                                                                                                                      | S-3  |
| 4       | <b>Table S1:</b> Surface elemental composition of Fe-nPPy/BiOI-3 as per XPS survey spectra.                                                                                                                              | S-3  |
| 5       | <b>Fig. S4:</b> SEM images (a & b) of BiOI and Fe-nPPy (c & d).                                                                                                                                                          | S-4  |
| 6       | <b>Fig. S5:</b> (a) Adsorption profiles of CV dye over Fe-nPPy/BiOI catalysts.                                                                                                                                           | S-5  |
| 7       | <b>Fig. S6:</b> Variation in the UV-Vis absorbance spectra with time of: (a) CV dye and (b) Tetracycline (TC) using Fe-nPPy/BiOI-3 photocatalyst under visible light irradiation.                                        | S-5  |
| 8       | <b>Table S2:</b> Comparison of the photocatalytic activity of the Fe-nPPy/BiOI-3 with some other hybrid composites for the degradation of Crystal violet (CV) dye and Tetracycline (TC) under visible light irradiation. | S-6  |
| 9       | <b>Fig. S7:</b> XRD patterns of fresh and recovered Fe-nPPy/BiOI-3 photocatalyst after three cycles                                                                                                                      | S-7  |
| 10      | <b>Fig. S8:</b> (a) Time-dependent variation of the UV-visible absorbance spectra of NBT during visible light irradiation in presence of Fe-nPPy/BiOI-3 photocatalyst and (b) the respective kinetic curve.              | S-8  |
| 11      | <b>Fig. S9:</b> (a) Mott-Schottky plots of (a) BiOI and (b) Fe-nPPy.                                                                                                                                                     | S-9  |
| 12      | <b>Fig. S10:</b> XPS spectra of Fe-nPPy/BiOI-3 before and after photocatalysis for Bi-4f and N-1s respectively.                                                                                                          | S-10 |
| 13      | <b>References</b>                                                                                                                                                                                                        | S-11 |

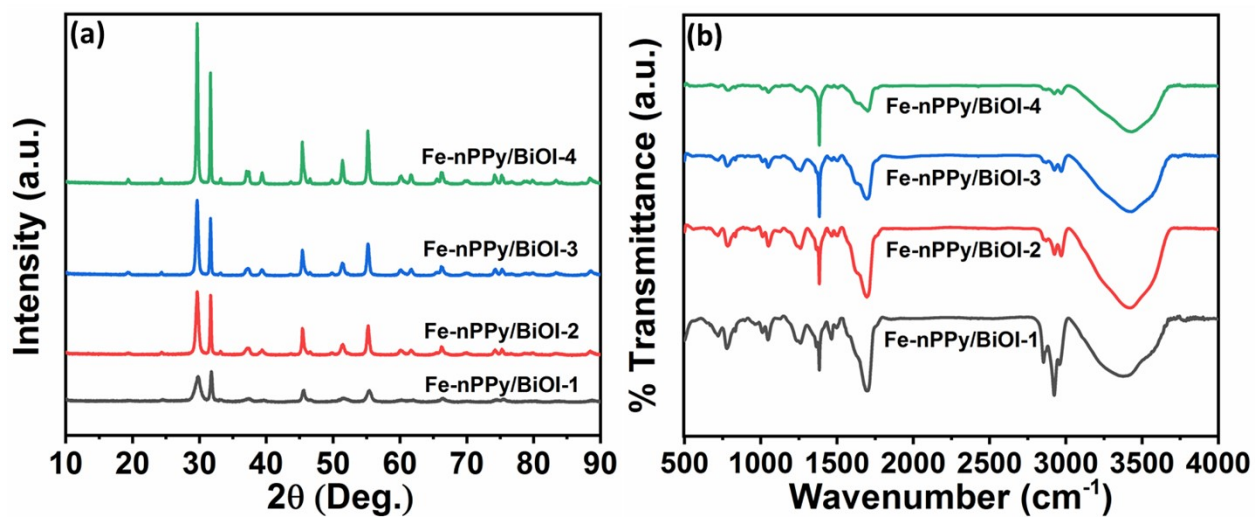

Fig. S1: (a) XRD patterns and (b) FTIR spectra of the synthesized nanocomposites.

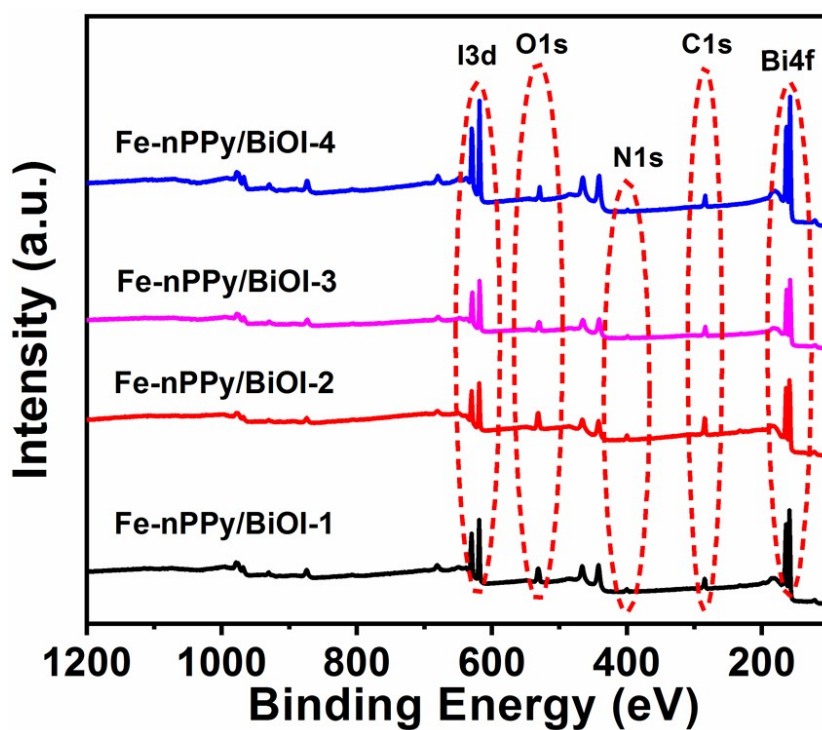

Fig. S2: XPS survey spectra of as synthesized nanocomposites.

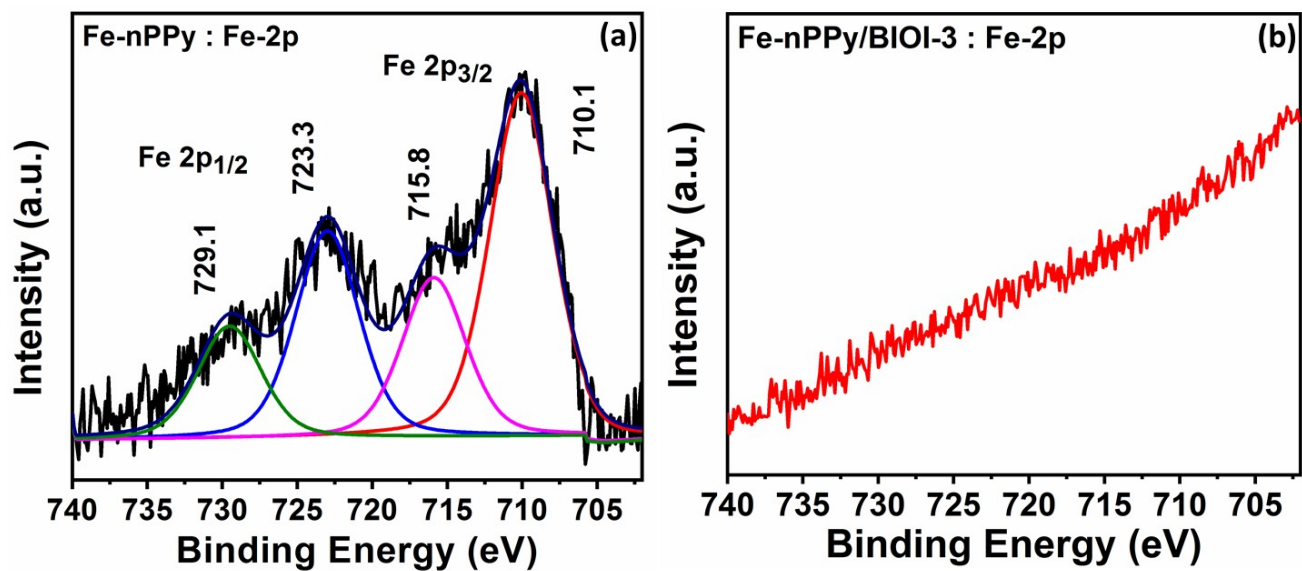

Fig. S3: Deconvoluted Fe2p XPS spectra of (a) Fe-nPPy and (b) Fe-nPPy/BiOI-3.

Table S1: Surface elemental composition of Fe-nPPy/BiOI-3 as per XPS survey spectra.

| Name | Peak BE | FWHM eV | Area (P)<br>CPS.eV | Atomic % | Q | SF     |
|------|---------|---------|--------------------|----------|---|--------|
| I3d  | 619.75  | 1.58    | 2755213.41         | 7.27     | 1 | 42.416 |
| Bi4f | 159.88  | 2.52    | 5469514.21         | 11.55    | 1 | 38.304 |
| C1s  | 285.87  | 3.08    | 608732.95          | 53.19    | 1 | 1      |
| O1s  | 531.23  | 4.23    | 596396.4           | 21.53    | 1 | 2.881  |
| N1s  | 400.79  | 3.3     | 110187.25          | 6.2      | 1 | 1.676  |
| Fe2p | 720.08  | 0.56    | 29798.18           | 0.25     | 1 | 14.353 |

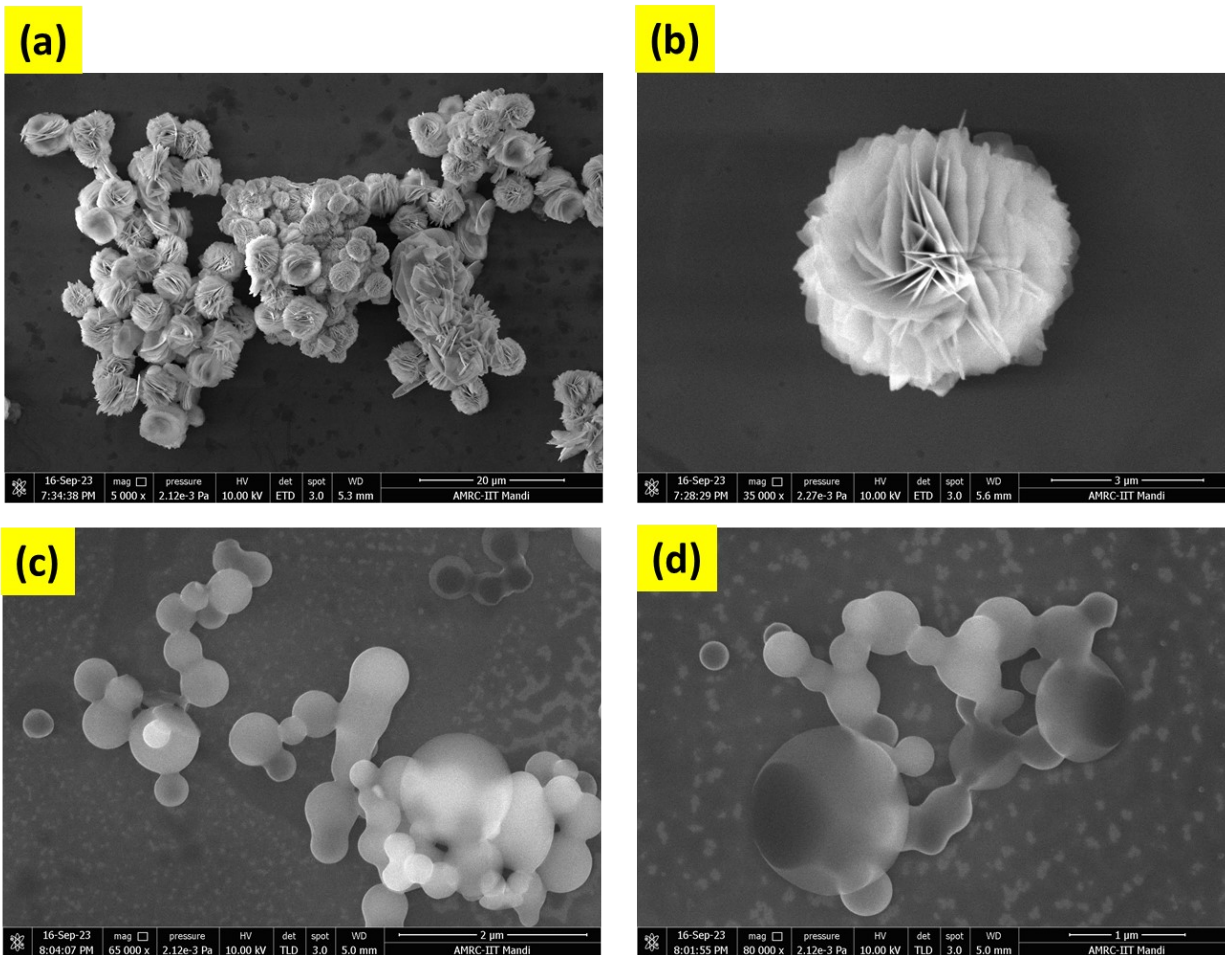

**Fig. S4:** FESEM images of: (a & b) BiOI and (c & d) Fe-nPPy.

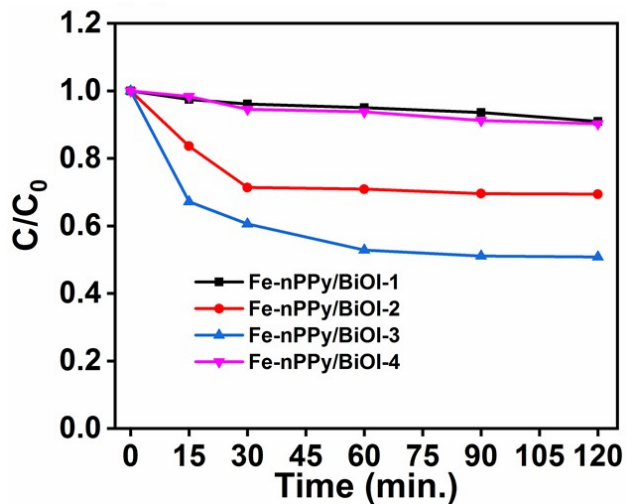

Fig. S5: (a) Adsorption profiles of CV dye over Fe-nPPy/BiOI catalysts.

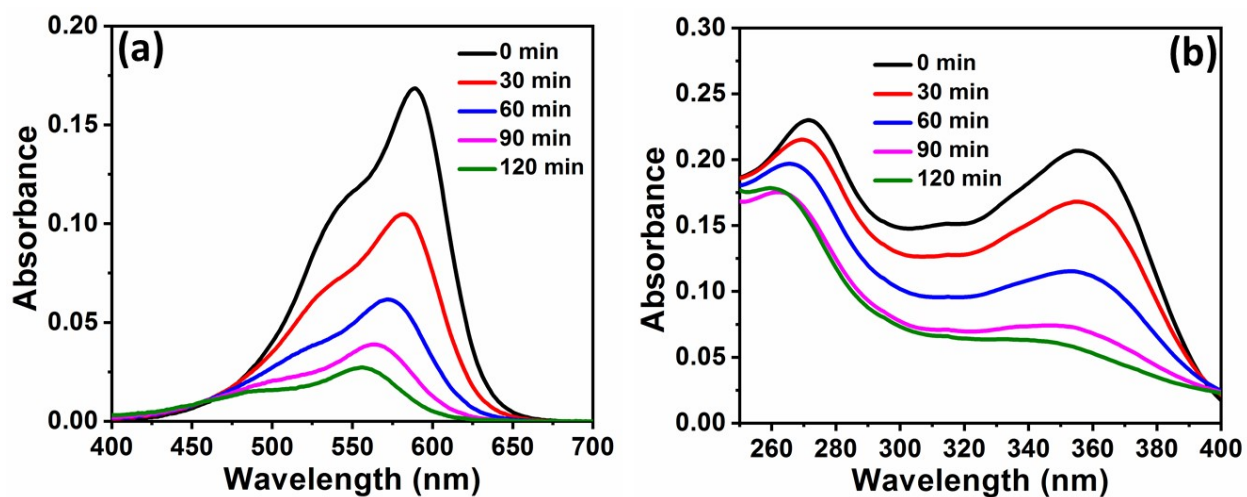

Fig. S6: Variation in the UV-Vis absorbance spectra with time of: (a) CV dye and (b) Tetracycline (TC) using Fe-nPPy/BiOI-3 photocatalyst under visible light irradiation.

**Table S2:** Comparison of the photocatalytic activity of the Fe-nPPy/BiOI-3 with some other hybrid composites for the degradation of Crystal violet (CV) dye and Tetracycline (TC) under visible light irradiation.

| Photocatalyst                                                    | Pollutant, concentration (ppm) | Catalyst amount (mg/mL) | Visible light source | Synthesis method             | Removal (%) | Time (min.) | References   |
|------------------------------------------------------------------|--------------------------------|-------------------------|----------------------|------------------------------|-------------|-------------|--------------|
| g-C <sub>3</sub> N <sub>4</sub> /Ag <sub>3</sub> VO <sub>4</sub> | CV, 20                         | 1                       | 500 W Xe arc lamp    | ultrasound-assisted          | 85          | 150         | [1]          |
| F-TiO <sub>2</sub> (B)/fullerene                                 | CV, 30                         | 0.1                     | 500 W halogen lamp   | Ballmill + hydrothermal      | 77.2        | 120         | [2]          |
| SrFeO <sub>3-x</sub> /g-C <sub>3</sub> N <sub>4</sub>            | CV, 10                         | 0.1                     | 150 W Xe arc lamp    | sintering method             | 99.9        | 720         | [3]          |
| Gd doped BiFeO <sub>3</sub>                                      | CV, 20                         | 0.2                     | 250 W mercury lamp   | auto-combustion method       | 84.5        | 150         | [4]          |
| Fe-nPPy/BiOI-3                                                   | CV, 10                         | 0.5                     | 192 W white LEDs     | RT co-precipitation          | 84.0        | 120         | Current work |
| Fe <sub>3</sub> O <sub>4</sub> @TiO <sub>2</sub> -Co             | TC, 50                         | 0.2                     | 300 W Xe arc lamp    | Facile reduction method      | 92.4        | 120         | [5]          |
| Ag/AgBr/AgI@SiO <sub>2</sub> aerogel                             | TC, Not known                  | 0.3                     | 300 W Xe arc lamp    | Supercritical drying process | 79.5        | 50          | [6]          |
| PPy-BiOI                                                         | TC, 30                         | 1                       | Not known            | Co-precipitation             | 61          | 300         | [7]          |
| Fe-nPPy/BiOI-3                                                   | TC, 20                         | 1                       | 192 W white LEDs     | RT co-precipitation          | 74          | 120         | Current work |

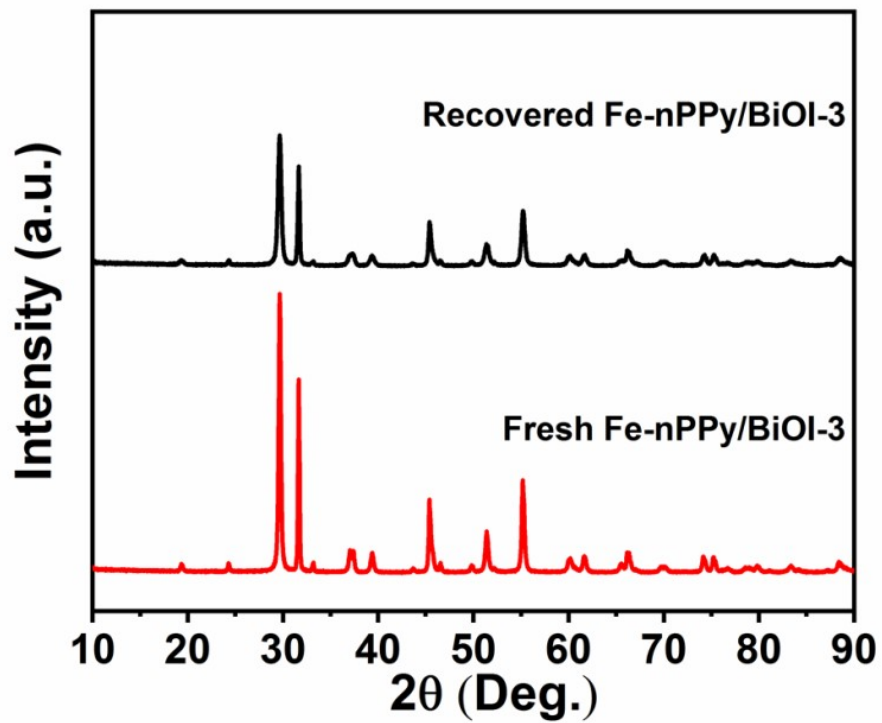

Fig. S7: XRD patterns of fresh and recovered Fe-nPPy/BiOI-3 photocatalyst after three cycles

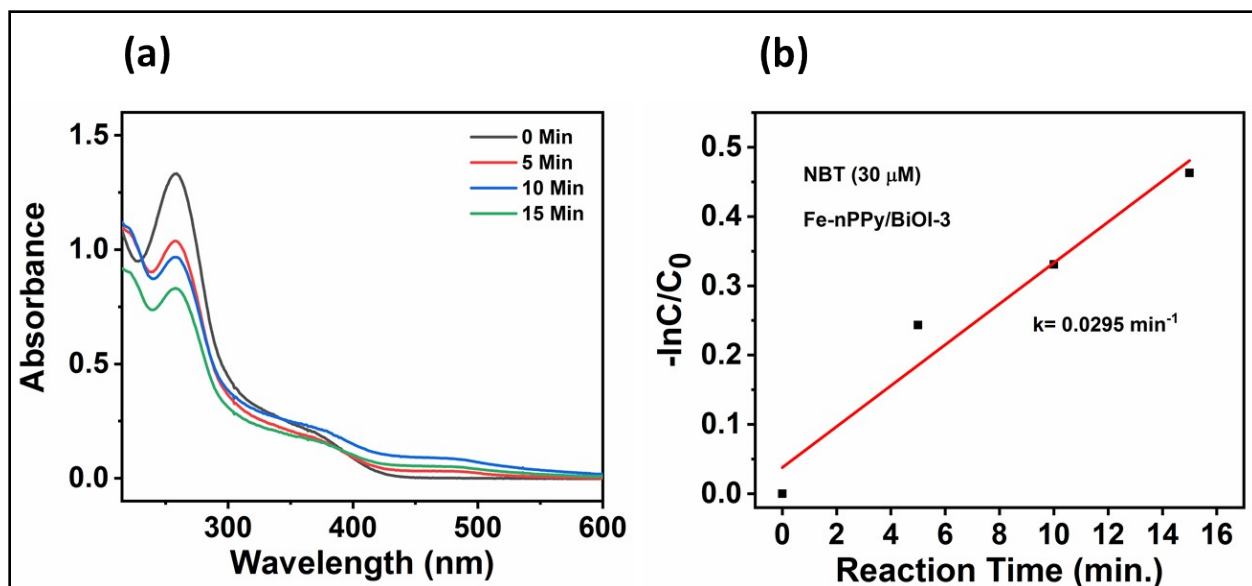

**Fig. S8:** (a) Time-dependent variation of the UV-visible absorbance spectra of NBT during visible light irradiation in presence of Fe-nPPy/BiOI-3 photocatalyst and (b) the respective kinetic curve.

$$\text{Concentration of } \bullet\text{O}_2^- \text{ radical} = k_{\text{NBT}} \times t \times C_{\text{initial}} \times 4$$

$$k_{\text{NBT}} = 0.0295 \text{ min}^{-1} \text{ (loss kinetic constant of NBT)}$$

$$t = 15 \text{ min (the light exposure time)}$$

$$C_{\text{initial}} = 30 \text{ } \mu\text{M (NBT initial concentration)}$$

4 is the constant coefficient between the reaction of NBT and  $\bullet\text{O}_2^-$



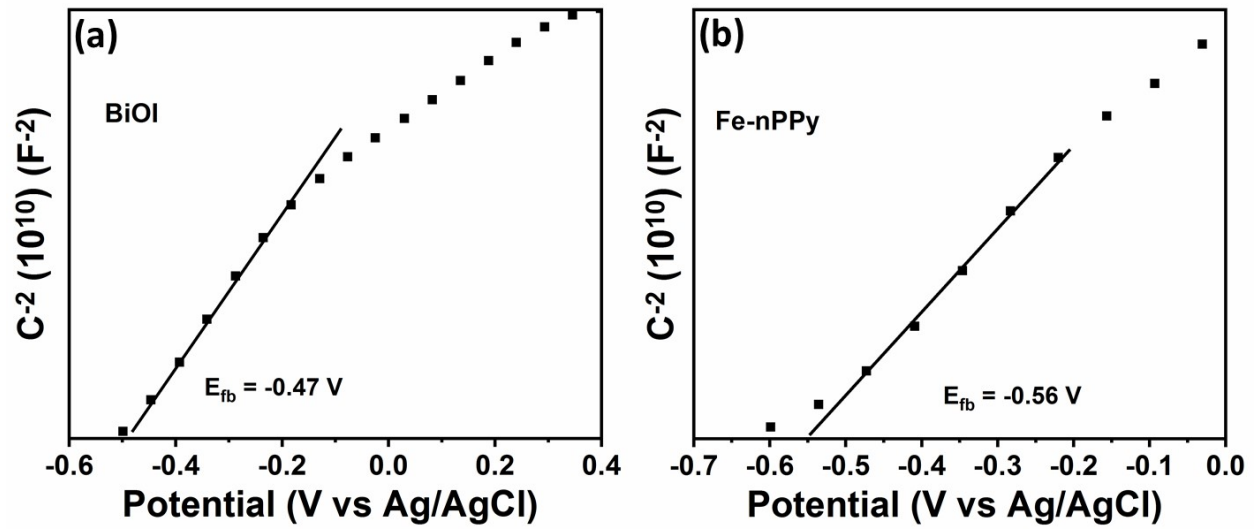

Fig. S9: (a) Mott-Schottky plots of (a) BiOI and (b) Fe-nPPy.

We have used the following relation for conduction band calculation;

$$E \text{ (RHE)} = E \text{ (Ag/AgCl)} + 0.197 \text{ (at pH = 7)}$$

Further, valence band edge is calculated by applying the relation;

$$E_{CB} = E_{VB} - E_g \text{ (} E_g \text{ is calculated from DRS studies for BiOI and Fe-nPPy)}$$

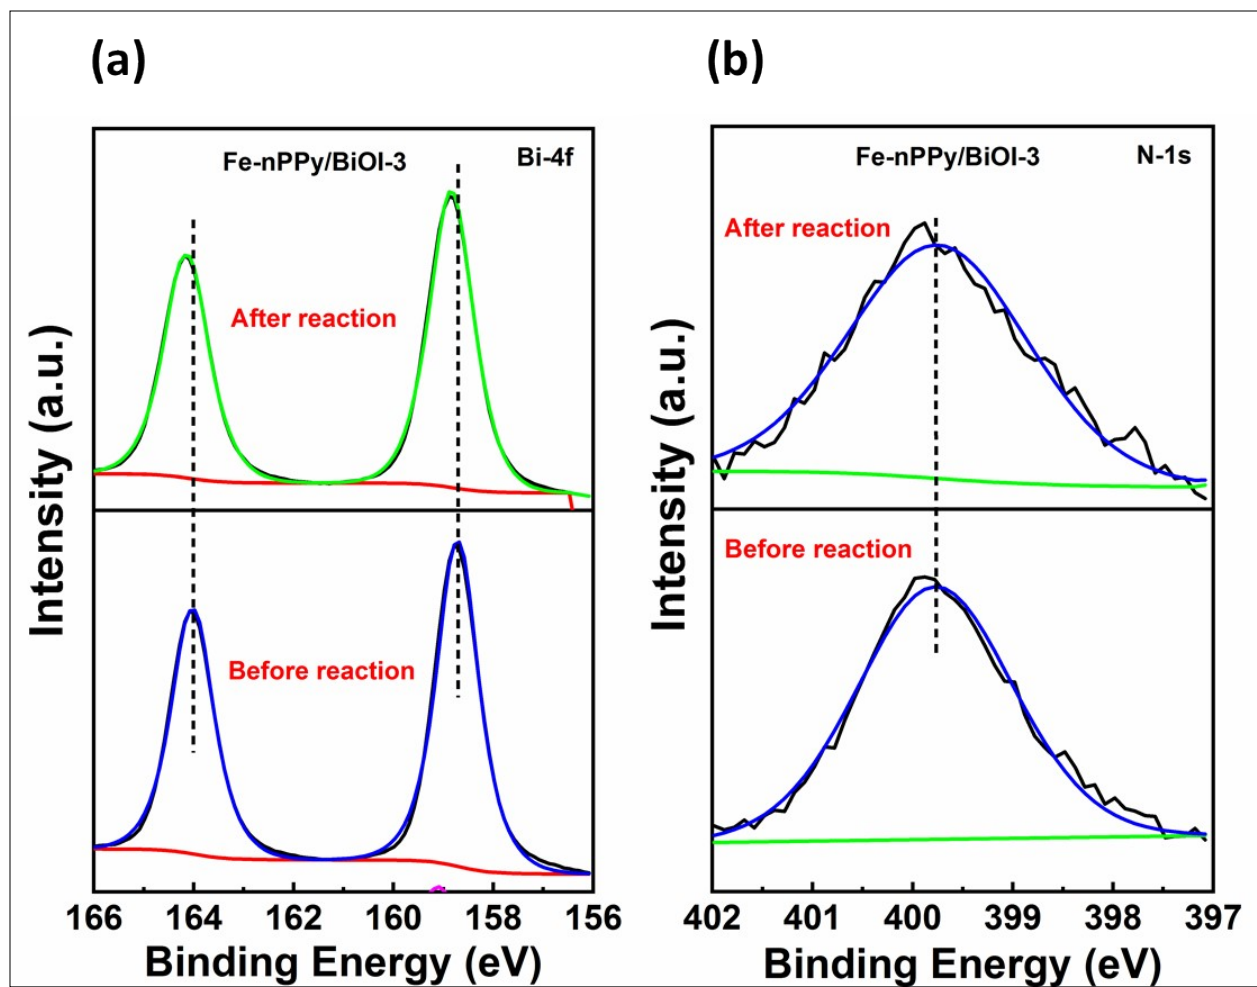

Fig. S10: XPS spectra of Fe-nPPy/BiOI-3 before and after photocatalysis for Bi-4f and N-1s respectively.

## References:

- S[1]:** S. Wang, D. Li, C. Sun, S. Yang, Y. Guan, H. He, Synthesis and characterization of g-C<sub>3</sub>N<sub>4</sub>/Ag<sub>3</sub>VO<sub>4</sub> composites with significantly enhanced visible-light photocatalytic activity for triphenylmethane dye degradation, *Appl. Catal. B Environ.* 144 (2014) 885–892. <https://doi.org/10.1016/j.apcatb.2013.08.008>
- S[2]:** Y. Panahian, N. Arsalani, R. Nasiri, Enhanced photo and sono-photo degradation of crystal violet dye in aqueous solution by 3D flower like F-TiO<sub>2</sub>(B)/fullerene under visible light, *J. Photochem. Photobiol. A Chem.* 365 (2018) 45–51. <https://doi.org/10.1016/J.JPHOTOCHEM.2018.07.035>
- S[3]:** H.P. Lin, C.C. Chen, W.W. Lee, Y.Y. Lai, J.Y. Chen, Y.Q. Chen, J.Y. Fu, Synthesis of a SrFeO<sub>3-x</sub>/g-C<sub>3</sub>N<sub>4</sub> heterojunction with improved visible-light photocatalytic activities in chloramphenicol and crystal violet degradation, *RSC Adv.* 6 (2016) 2323–2336. <https://doi.org/10.1039/c5ra21339h>
- S[4]:** S. Kossar, I.B.S. Banu, N. Aman, R. Amiruddin, Investigation on photocatalytic degradation of crystal violet dye using bismuth ferrite nanoparticles, *J. Dispers. Sci. Technol.* 42 (2021) 2053–2062. <https://doi.org/10.1080/01932691.2020.1806861>
- S[5]:** Tan, Q., Zhang, W., ... Niu, Li, 2023. Magnetically induced construction of core-shell architecture Fe<sub>3</sub>O<sub>4</sub>@TiO<sub>2</sub>-Co nanocomposites for effective photocatalytic degradation of tetracycline. *New Journal of Chemistry* 47, 15951–15962. doi:10.1039/d3nj02080k
- S[6]:** Ma, C., Shi, F., Liu, J., Li, T., Zhu, K., Liu, J., ... Xiao, J. (2023, June 1). Construction of a novel Ag/AgBr/AgI@SiO<sub>2</sub> composite aerogel with controlled pore structure: Efficient removal of tetracycline by adsorption/photocatalysis synergism under visible light irradiation. *Journal of Environmental Chemical Engineering*. Elsevier Ltd. <https://doi.org/10.1016/j.jece.2023.110157>
- S[7]:** Xu, J., Hu, Y., Zeng, C., Zhang, Y., & Huang, H. (2017). Polypyrrole decorated BiOI nanosheets: Efficient photocatalytic activity for treating diverse contaminants and the critical role of bifunctional polypyrrole. *Journal of Colloid and Interface Science*, 505, 719–727. <https://doi.org/10.1016/j.jcis.2017.06.054>
